# Supplementary material
Source: PubMed Central journal article supplement (PMC4794346)
Supplement: NIHMS744586-supplement-Figure_2a.pdf [file NIHMS744586-supplement-Figure_2a.pdf]

# Supplemental Figure 2a

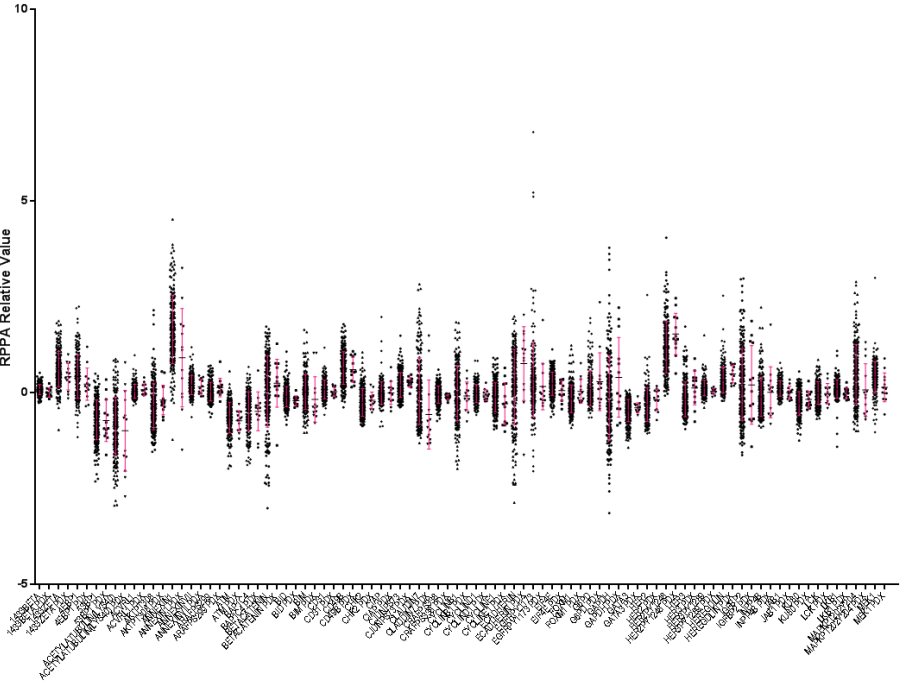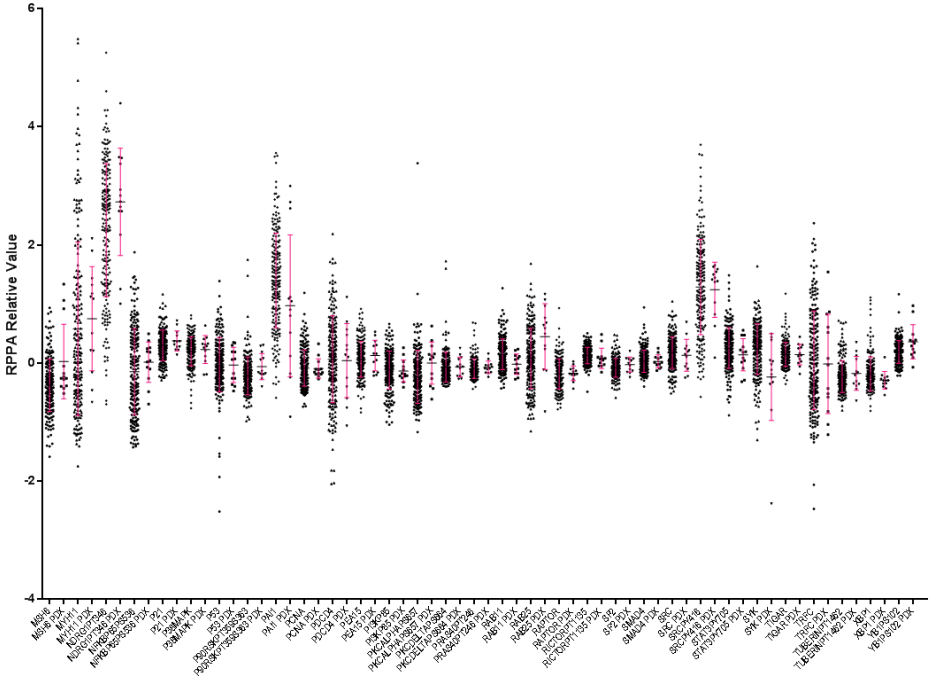

**Primary HNSCC and PDX jitter plots for range data visualization.** 173 primary HNSCC and 12 PDXs are plotted in separate columns by protein. A) 76 proteins expressed at similar levels in both primary HNSCC and PDX.
