# Supplementary material
Source: PubMed Central journal article supplement (PMC4794346)
Supplement: NIHMS744586-supplement-Figure_2b.pdf [file NIHMS744586-supplement-Figure_2b.pdf]

# Supplemental Figure 2b

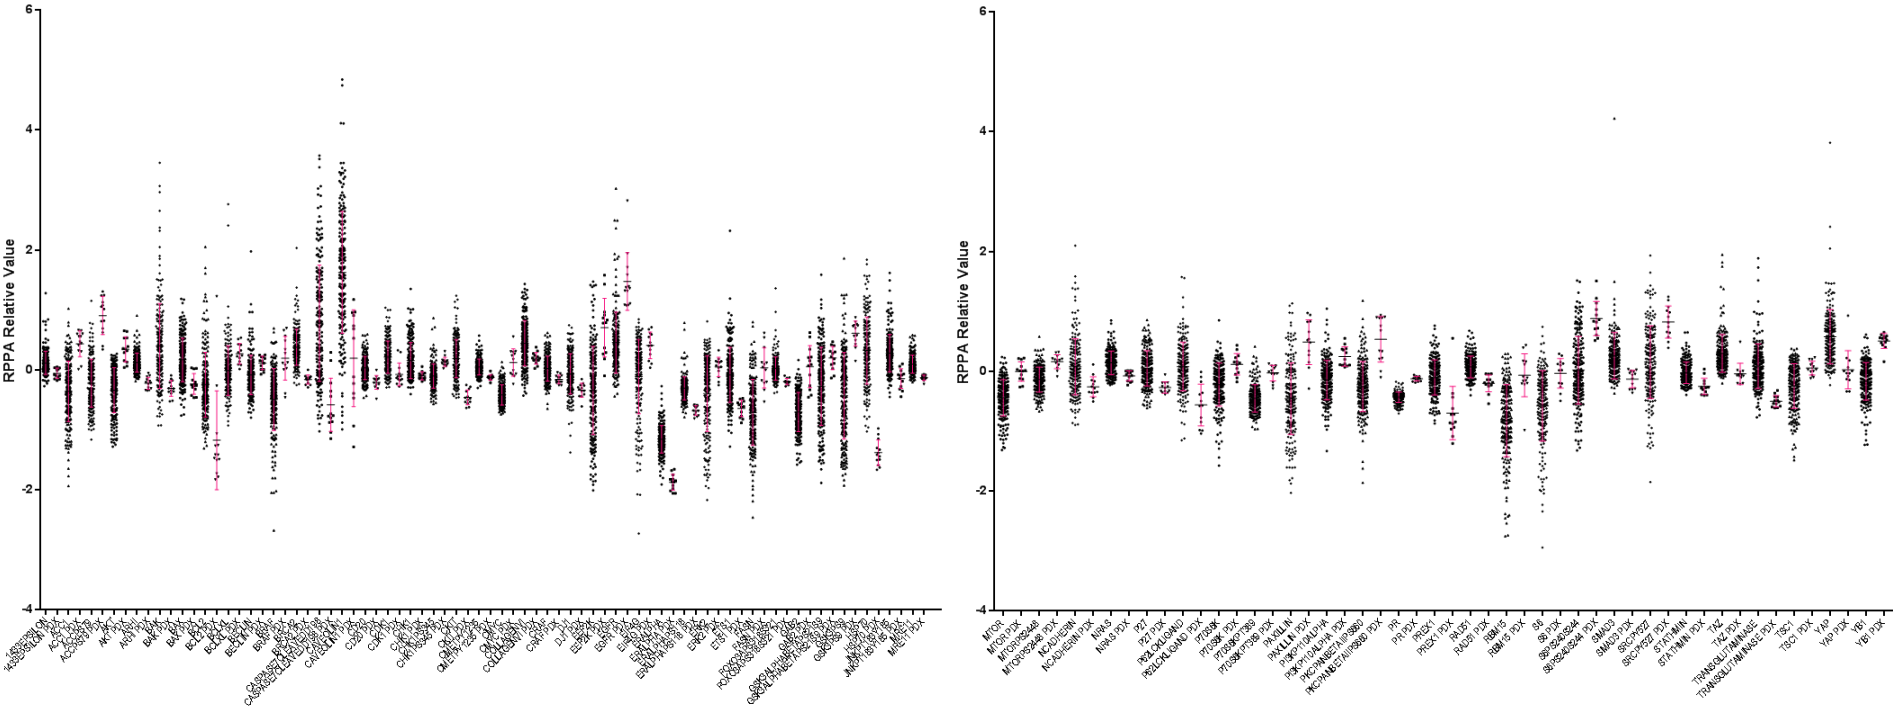

**Primary HNSCC and PDX jitter plots for data range visualization.** 173 primary HNSCC and 12 PDXs are plotted in separate columns by protein. B) 64 proteins expressed at significantly different levels in both primary HNSCC and PDX.
