# Supplementary material
Source: PubMed Central journal article supplement (PMC4794346)
Supplement: NIHMS744586-supplement-Table_1.pdf [file NIHMS744586-supplement-Table_1.pdf]

Supplemental Table 1. Proteins expressed at similar levels in both primary HNSCC and PDXs

| Rank | Antibody        | meanDiff | pvalue | qvalue |
|------|-----------------|----------|--------|--------|
| 1    | CIAP            | 0.00119  | 0.99   | 0.99   |
| 2    | P53             | 0.00682  | 0.94   | 0.945  |
| 3    | LCK             | 0.00832  | 0.921  | 0.93   |
| 4    | BETACATENIN     | 0.0233   | 0.906  | 0.92   |
| 5    | RAPTOR          | -0.00692 | 0.869  | 0.888  |
| 6    | EGFR(pY1173)    | 0.037    | 0.846  | 0.87   |
| 7    | SRC(pY416)      | 0.0298   | 0.847  | 0.87   |
| 8    | P38MAPK         | -0.0153  | 0.837  | 0.869  |
| 9    | PRAS40(pT246)   | -0.00747 | 0.778  | 0.813  |
| 10   | TUBERIN(pT1462) | -0.0213  | 0.778  | 0.813  |
| 11   | PCNA            | 0.0219   | 0.689  | 0.727  |
| 12   | IGFBP2          | 0.131    | 0.672  | 0.713  |
| 13   | TIGAR           | -0.0212  | 0.653  | 0.697  |
| 14   | CD31            | 0.0182   | 0.645  | 0.692  |
| 15   | SMAD4           | -0.0165  | 0.57   | 0.616  |
| 16   | TRFC            | 0.148    | 0.571  | 0.616  |
| 17   | ACETYLATUBULIN  | 0.191    | 0.549  | 0.599  |
| 18   | CJUN(PS73)      | -0.0296  | 0.51   | 0.567  |
| 19   | KU80            | -0.0357  | 0.513  | 0.567  |
| 20   | PDCD4           | 0.131    | 0.516  | 0.567  |
| 21   | PI3K-P85        | 0.0409   | 0.507  | 0.566  |
| 22   | ANNEXINVII      | 0.0439   | 0.483  | 0.543  |
| 23   | CHK2            | -0.0464  | 0.472  | 0.535  |
| 24   | NFKBP65(pS536)  | -0.0842  | 0.473  | 0.535  |
| 25   | PAI1            | 0.277    | 0.443  | 0.507  |
| 26   | CYCLINE1        | 0.132    | 0.41   | 0.472  |
| 27   | CD49B           | 0.0809   | 0.401  | 0.464  |
| 28   | INPP4B          | -0.169   | 0.392  | 0.457  |
| 29   | G6PD            | -0.226   | 0.332  | 0.389  |
| 30   | 4EBP1           | 0.127    | 0.317  | 0.376  |
| 31   | 53BP1           | 0.157    | 0.319  | 0.376  |
| 32   | SRC             | 0.081    | 0.314  | 0.375  |
| 33   | HER2            | -0.0953  | 0.299  | 0.359  |
| 34   | AKT(pT308)      | -0.126   | 0.249  | 0.302  |
| 35   | CYCLIND1        | 0.0434   | 0.215  | 0.262  |
| 36   | P21             | -0.0723  | 0.201  | 0.246  |
| 37   | PKCDELTA(pS664) | -0.0664  | 0.194  | 0.239  |
| 38   | STAT3(pY705)    | 0.119    | 0.184  | 0.232  |
| 39   | JAB1            | 0.0679   | 0.186  | 0.232  |
| 40   | SF2             | -0.0468  | 0.187  | 0.232  |
| 41   | MYH11           | -0.36    | 0.179  | 0.227  |
| 42   | ATM             | 0.122    | 0.166  | 0.212  |
| 43   | ECADHERIN       | -0.432   | 0.164  | 0.211  |
| 44   | YB1(pS102)      | -0.103   | 0.161  | 0.208  |

|                        |         |        |        |
|------------------------|---------|--------|--------|
| 45 1433ZETA            | 0.14    | 0.161  | 0.208  |
| 46 BAP1C4              | 0.184   | 0.155  | 0.203  |
| 47 CYCLINB1            | 0.175   | 0.145  | 0.191  |
| 48 ACVRL1              | -0.073  | 0.142  | 0.189  |
| 49 XBP1                | 0.0778  | 0.129  | 0.173  |
| 50 MSH6                | -0.276  | 0.129  | 0.173  |
| 51 1433BETA            | 0.0602  | 0.119  | 0.162  |
| 52 CRAF(pS338)         | 0.042   | 0.111  | 0.151  |
| 53 PEA15               | -0.129  | 0.108  | 0.148  |
| 54 HER3(pY1289)        | 0.0438  | 0.105  | 0.146  |
| 55 GATA3               | -0.0757 | 0.0901 | 0.128  |
| 56 RICTOR(pT1135)      | 0.0708  | 0.0908 | 0.128  |
| 57 FOXM1               | -0.171  | 0.0913 | 0.128  |
| 58 NDRG1(pT346)        | -0.47   | 0.0846 | 0.121  |
| 59 BID                 | 0.0765  | 0.0831 | 0.12   |
| 60 ANNEXIN1            | 0.633   | 0.0767 | 0.111  |
| 61 BIM                 | 0.281   | 0.0724 | 0.107  |
| 62 GAPDH               | -0.594  | 0.0735 | 0.107  |
| 63 ARAF(pS299)         | -0.133  | 0.0711 | 0.105  |
| 64 CLAUDIN7            | 0.585   | 0.0573 | 0.0857 |
| 65 MAPK(pT202, Y204)   | 0.454   | 0.0508 | 0.0766 |
| 66 P90RSK(pT359, S363) | -0.142  | 0.0499 | 0.0759 |
| 67 HER2(pY1248)        | -0.363  | 0.047  | 0.072  |
| 68 HEREGULIN           | -0.164  | 0.0444 | 0.0688 |
| 69 LKB1                | 0.091   | 0.0445 | 0.0688 |
| 70 EIF4E               | 0.155   | 0.0434 | 0.0682 |
| 71 PKCALPHA9(pS6570)   | -0.256  | 0.0395 | 0.0625 |
| 72 RAB25               | -0.383  | 0.0377 | 0.0601 |
| 73 SYK                 | 0.529   | 0.0361 | 0.0581 |
| 74 MEK1                | 0.278   | 0.034  | 0.0552 |
| 75 RAB11               | 0.119   | 0.0333 | 0.0545 |
| 76 HER3                | -0.324  | 0.0315 | 0.0521 |

---
