# Supplementary material
Source: PubMed Central journal article supplement (PMC4794346)
Supplement: NIHMS744586-supplement-Table_2.pdf [file NIHMS744586-supplement-Table_2.pdf]

Supplemental Table 2. Proteins expressed differentially in both primary HNSCC and PDXs

| Rank | Antibody              | meanDiff | pvalue   | qvalue   |
|------|-----------------------|----------|----------|----------|
| 1    | TRANSGLUTAMINASE      | 0.587    | 3.86E-19 | 7.34E-17 |
| 2    | HSP70                 | 1.68     | 1.27E-18 | 1.21E-16 |
| 3    | BRCA2                 | 0.48     | 2.16E-17 | 1.37E-15 |
| 4    | PR                    | -0.318   | 5.02E-15 | 2.31E-13 |
| 5    | BAK                   | 0.64     | 6.07E-15 | 2.31E-13 |
| 6    | FOXO3A(pS318, S321)   | 0.196    | 4.84E-14 | 1.53E-12 |
| 7    | CKIT                  | 0.624    | 1.12E-13 | 3.05E-12 |
| 8    | GSK3PS9               | -0.936   | 2.68E-13 | 6.37E-12 |
| 9    | ETS1                  | 0.504    | 6.77E-13 | 1.43E-11 |
| 10   | YB1                   | -0.646   | 1.84E-12 | 3.45E-11 |
| 11   | MRE11                 | 0.202    | 2.00E-12 | 3.45E-11 |
| 12   | TAZ                   | 0.33     | 4.87E-12 | 7.71E-11 |
| 13   | ERALPHA               | 0.681    | 2.33E-11 | 3.40E-10 |
| 14   | ERALPHA(pS118)        | 0.352    | 1.33E-10 | 1.80E-09 |
| 15   | YAP                   | 0.603    | 5.29E-10 | 6.70E-09 |
| 16   | CASPASE7(CLEAVEDD198) | 1.43     | 5.85E-10 | 6.95E-09 |
| 17   | CMET(pY1235)          | 0.149    | 5.86E-09 | 6.32E-08 |
| 18   | ACC1                  | -0.723   | 5.99E-09 | 6.32E-08 |
| 19   | P27                   | 0.276    | 1.27E-08 | 1.24E-07 |
| 20   | CHK1                  | 0.197    | 1.31E-08 | 1.24E-07 |
| 21   | ARHI                  | 0.331    | 1.78E-08 | 1.61E-07 |
| 22   | ACC(pS790)            | -1.12    | 2.76E-08 | 2.39E-07 |
| 23   | P70S6K(pT389)         | -0.441   | 3.65E-08 | 3.02E-07 |
| 24   | CHK1(pS345)           | -0.224   | 4.39E-08 | 3.48E-07 |
| 25   | S6(pS240, S244)       | -0.803   | 1.65E-07 | 1.25E-06 |
| 26   | AKT                   | -0.621   | 1.71E-07 | 1.25E-06 |
| 27   | JNK(pT183,Y185)       | 0.416    | 2.84E-07 | 2.00E-06 |
| 28   | PREX1                 | 0.681    | 4.06E-07 | 2.75E-06 |
| 29   | CRAF                  | 0.168    | 6.53E-07 | 4.28E-06 |
| 30   | BCL2                  | 1.09     | 6.90E-07 | 4.37E-06 |
| 31   | CMYC                  | -0.574   | 8.59E-07 | 5.27E-06 |
| 32   | SRC(pY527)            | -0.646   | 1.00E-06 | 5.95E-06 |
| 33   | MTOR(pS2448)          | -0.293   | 1.28E-06 | 7.36E-06 |
| 34   | MTOR                  | -0.4     | 1.38E-06 | 7.72E-06 |
| 35   | NRAS                  | 0.181    | 1.67E-06 | 9.08E-06 |
| 36   | PAXILLIN              | -0.91    | 2.03E-06 | 1.07E-05 |
| 37   | PKCPANBETAIIPS660     | -0.813   | 2.37E-06 | 1.19E-05 |
| 38   | SMAD3                 | 0.332    | 2.38E-06 | 1.19E-05 |
| 39   | NCADHERIN             | 0.271    | 3.53E-06 | 1.72E-05 |
| 40   | ERK2                  | -0.356   | 3.95E-06 | 1.80E-05 |
| 41   | BCLXL                 | -0.326   | 3.99E-06 | 1.80E-05 |
| 42   | FASN                  | -0.647   | 4.04E-06 | 1.80E-05 |
| 43   | PI3KP110ALPHA         | -0.361   | 4.08E-06 | 1.80E-05 |
| 44   | GAB2                  | -0.762   | 6.81E-06 | 2.94E-05 |

|    |                     |        |          |          |
|----|---------------------|--------|----------|----------|
| 45 | EEF2K               | -1.01  | 7.42E-06 | 3.13E-05 |
| 46 | DJ1                 | 0.235  | 1.13E-05 | 4.68E-05 |
| 47 | STATHMIN            | 0.216  | 1.16E-05 | 4.68E-05 |
| 48 | CDK1                | 0.302  | 1.19E-05 | 4.70E-05 |
| 49 | BAX                 | 0.351  | 1.26E-05 | 4.90E-05 |
| 50 | GSK3ALPHABETAPS21S9 | -0.371 | 1.43E-05 | 5.32E-05 |
| 51 | TSC1                | -0.227 | 1.43E-05 | 5.32E-05 |
| 52 | S6                  | -0.488 | 1.49E-05 | 5.44E-05 |
| 53 | EGFR                | -1.03  | 1.53E-05 | 5.48E-05 |
| 54 | BECLIN              | -0.213 | 1.82E-05 | 6.42E-05 |
| 55 | CD20                | 0.222  | 2.41E-05 | 8.32E-05 |
| 56 | COLLAGENVI          | 0.186  | 2.45E-05 | 8.32E-05 |
| 57 | P70S6K              | -0.299 | 2.62E-05 | 8.73E-05 |
| 58 | BRAF                | -0.628 | 2.67E-05 | 8.73E-05 |
| 59 | EIF4G               | -0.39  | 3.06E-05 | 9.85E-05 |
| 60 | RBM15               | -0.622 | 3.46E-05 | 0.000108 |
| 61 | P62LCKLIGAND        | 0.676  | 3.47E-05 | 0.000108 |
| 62 | 1433EPSILON         | 0.149  | 4.98E-05 | 0.000153 |
| 63 | RAD51               | 0.253  | 6.88E-05 | 0.000207 |
| 64 | CAVEOLIN1           | 1.38   | 7.92E-05 | 0.000235 |

---
